# Supplementary material
Source: PubMed Central journal article supplement (PMC6635027)
Supplement: NIHMS1025612-supplement-Supp_info.pdf [file NIHMS1025612-supplement-Supp_info.pdf]

Tamirisa N, et al. The Impact of Chemotherapy Sequence on Survival in Node-Positive Invasive Lobular Carcinoma

Supplemental Tables

**Supplemental Table 1.** Adjusted Overall Survival, cT1-4c, cN1-3 Invasive Lobular Carcinoma Patients, National Cancer Data Base, 2004-2013, Stage II (N=8,852)

**Supplemental Table 2.** Adjusted Overall Survival, cT1-4c, cN1-3 Invasive Lobular Carcinoma Patients, National Cancer Data Base, 2004-2013, Stage III (N=4,473)

**Supplemental Table 1. Adjusted Overall Survival, cT1-4c, cN1-3 Invasive Lobular Carcinoma Patients, National Cancer Data Base, 2004-2013, Stage II (N=8,852)**

|                                        | HR (95% CI)        | P-Value | Overall P-Value |
|----------------------------------------|--------------------|---------|-----------------|
| Treatment group                        |                    |         | <0.001          |
| ACT                                    | REF                |         |                 |
| NACT                                   | 1.39 (1.24 - 1.57) | <0.001  |                 |
| Age (years)                            |                    |         | <0.001          |
| ≥50                                    | REF                |         |                 |
| <50                                    | 0.63 (0.55 - 0.72) | <0.001  |                 |
| Race                                   |                    |         | 0.03            |
| White                                  | REF                |         |                 |
| Black                                  | 1.22 (1.04 - 1.43) | 0.01    |                 |
| Other                                  | 0.84 (0.59 - 1.21) | 0.36    |                 |
| Ethnicity                              |                    |         | <0.001          |
| Hispanic                               | REF                |         |                 |
| Non-Hispanic                           | 1.73 (1.29 - 2.31) | <0.001  |                 |
| Charlson/Deyo comorbidity score        |                    |         | <0.001          |
| 0                                      | REF                |         |                 |
| 1                                      | 1.34 (1.15 - 1.57) | <0.001  |                 |
| ≥2                                     | 1.62 (1.19 - 2.21) | 0.002   |                 |
| Clinical T stage                       |                    |         | <0.001          |
| 1                                      | REF                |         |                 |
| 2                                      | 1.39 (1.19 - 1.61) | <0.001  |                 |
| 3                                      | 1.73 (1.46 - 2.04) | <0.001  |                 |
| Grade                                  |                    |         | <0.001          |
| 1                                      | REF                |         |                 |
| 2                                      | 1.19 (1.01 - 1.39) | 0.04    |                 |
| 3                                      | 1.79 (1.49 - 2.15) | <0.001  |                 |
| Surgery type                           |                    |         | 0.57            |
| Lumpectomy                             | REF                |         |                 |
| Mastectomy                             | 1.10 (0.79 - 1.55) | 0.57    |                 |
| Treated with radiation post-lumpectomy |                    |         | 0.08            |
| No                                     | REF                |         |                 |
| Yes                                    | 0.73 (0.51 - 1.03) | 0.08    |                 |
| Treated with radiation post-mastectomy |                    |         | 0.005           |
| No                                     | REF                |         |                 |
| Yes                                    | 1.21 (1.06 - 1.39) | 0.005   |                 |
| Treated with endocrine therapy         |                    |         | <0.001          |
| No                                     | REF                |         |                 |
| Yes                                    | 0.73 (0.63 - 0.83) | <0.001  |                 |
| Income level (\$)                      |                    |         | 0.57            |
| <\$35,000                              | REF                |         |                 |
| ≥\$35,000                              | 1.05 (0.89 - 1.22) | 0.57    |                 |

|                                  | HR (95% CI)        | P-Value | Overall P-Value |
|----------------------------------|--------------------|---------|-----------------|
| Insurance status                 |                    |         | <0.001          |
| Private                          | REF                |         |                 |
| Government                       | 1.67 (1.49 - 1.88) | <0.001  |                 |
| Not Insured                      | 1.62 (1.15 - 2.29) | 0.006   |                 |
| Education level                  |                    |         | 0.22            |
| ≤80% High School Graduation Rate | REF                |         |                 |
| >80% High School Graduation Rate | 0.92 (0.79 - 1.05) | 0.22    |                 |
| Facility type                    |                    |         | 0.29            |
| Academic                         | REF                |         |                 |
| Integrated Network               | 1.12 (0.91 - 1.38) | 0.27    |                 |
| Comprehensive                    | 1.01 (0.88 - 1.16) | 0.89    |                 |
| Community                        | 1.18 (0.96 - 1.44) | 0.11    |                 |
| Facility location                |                    |         | 0.08            |
| South                            | REF                |         |                 |
| Midwest                          | 1.03 (0.89 - 1.19) | 0.68    |                 |
| Northeast                        | 0.91 (0.77 - 1.07) | 0.25    |                 |
| West                             | 0.83 (0.69 - 0.99) | 0.04    |                 |

Hazard ratios, confidence intervals, and p-values are from a Cox proportional hazards model, stratified by year of diagnosis (grouped as 2004-2009 and 2010-2013) and hormone receptor status (positive/negative). A robust sandwich covariance estimator was used to account for correlation of patients treated at the same facility.

ACT: adjuvant chemotherapy. NACT: neoadjuvant chemotherapy.

**Supplemental Table 2. Adjusted Overall Survival, cT1-4c, cN1-3 Invasive Lobular Carcinoma Patients, National Cancer Data Base, 2004-2013, Stage III (N=4,473)**

|                                        | HR (95% CI)        | P-Value | Overall P-Value |
|----------------------------------------|--------------------|---------|-----------------|
| Treatment group                        |                    |         | <0.001          |
| ACT                                    | REF                |         |                 |
| NACT                                   | 1.36 (1.16 - 1.59) | <0.001  |                 |
| Age (years)                            |                    |         | 0.35            |
| ≥50                                    | REF                |         |                 |
| <50                                    | 0.93 (0.79 - 1.09) | 0.35    |                 |
| Race                                   |                    |         | 0.001           |
| White                                  | REF                |         |                 |
| Black                                  | 1.23 (1.00 - 1.52) | 0.046   |                 |
| Other                                  | 0.48 (0.29 - 0.79) | 0.004   |                 |
| Ethnicity                              |                    |         | 0.41            |
| Hispanic                               | REF                |         |                 |
| Non-Hispanic                           | 1.15 (0.83 - 1.58) | 0.41    |                 |
| Charlson/Deyo comorbidity score        |                    |         | 0.22            |
| 0                                      | REF                |         |                 |
| 1                                      | 1.15 (0.96 - 1.38) | 0.14    |                 |
| ≥2                                     | 1.24 (0.83 - 1.84) | 0.29    |                 |
| Clinical T stage                       |                    |         | <0.001          |
| 1                                      | REF                |         |                 |
| 2                                      | 1.01 (0.79 - 1.28) | 0.96    |                 |
| 3                                      | 1.12 (0.89 - 1.41) | 0.35    |                 |
| 4                                      | 1.92 (1.43 - 2.58) | <0.001  |                 |
| Clinical N stage                       |                    |         | <0.001          |
| 1                                      | REF                |         |                 |
| 2                                      | 1.26 (0.97 - 1.65) | 0.09    |                 |
| 3                                      | 2.06 (1.58 - 2.68) | <0.001  |                 |
| Grade                                  |                    |         | <0.001          |
| 1                                      | REF                |         |                 |
| 2                                      | 1.31 (1.06 - 1.62) | 0.01    |                 |
| 3                                      | 1.59 (1.26 - 2.01) | <0.001  |                 |
| Surgery type                           |                    |         | 0.99            |
| Lumpectomy                             | REF                |         |                 |
| Mastectomy                             | 0.99 (0.69 - 1.43) | 0.99    |                 |
| Treated with radiation post-lumpectomy |                    |         | 0.009           |
| No                                     | REF                |         |                 |
| Yes                                    | 0.58 (0.39 - 0.87) | 0.009   |                 |
| Treated with radiation post-mastectomy |                    |         | <0.001          |
| No                                     | REF                |         |                 |
| Yes                                    | 0.73 (0.61 - 0.86) | <0.001  |                 |
| Treated with endocrine therapy         |                    |         | 0.006           |

|                                  | HR (95% CI)        | P-Value | Overall P-Value |
|----------------------------------|--------------------|---------|-----------------|
| No                               | REF                |         |                 |
| Yes                              | 0.79 (0.67 - 0.93) | 0.006   |                 |
| Income level (\$)                |                    |         | 0.34            |
| <\$35,000                        | REF                |         |                 |
| ≥\$35,000                        | 0.92 (0.77 - 1.09) | 0.34    |                 |
| Insurance status                 |                    |         | <0.001          |
| Private                          | REF                |         |                 |
| Government                       | 1.39 (1.22 - 1.59) | <0.001  |                 |
| Not Insured                      | 0.78 (0.48 - 1.27) | 0.32    |                 |
| Education level                  |                    |         | 0.13            |
| ≤80% High School Graduation Rate | REF                |         |                 |
| >80% High School Graduation Rate | 0.88 (0.75 - 1.04) | 0.13    |                 |
| Facility type                    |                    |         | 0.041           |
| Academic                         | REF                |         |                 |
| Integrated Network               | 1.16 (0.90 - 1.48) | 0.25    |                 |
| Comprehensive                    | 1.27 (1.07 - 1.49) | 0.01    |                 |
| Community                        | 1.24 (0.98 - 1.56) | 0.07    |                 |
| Facility location                |                    |         | 0.004           |
| South                            | REF                |         |                 |
| Midwest                          | 1.15 (0.96 - 1.37) | 0.14    |                 |
| Northeast                        | 0.91 (0.76 - 1.09) | 0.32    |                 |
| West                             | 0.78 (0.63 - 0.95) | 0.02    |                 |

Hazard ratios, confidence intervals, and p-values are from a Cox proportional hazards model, stratified by year of diagnosis (grouped as 2004-2009 and 2010-2013) and hormone receptor status (positive/negative). A robust sandwich covariance estimator was used to account for correlation of patients treated at the same facility.

ACT: adjuvant chemotherapy. NACT: neoadjuvant chemotherapy.
